# Supplementary material for: Dynamics of drying colloidal suspensions, measured by optical coherence tomography
Source: Royal Society of Chemistry journal article supplement (doi:10.1039/d3sm01560b), 2024-01-01
Supplement: d3sm01560b1.pdf [file d3sm01560b1.pdf]

**Dynamics of drying colloidal suspensions, measured by optical coherence tomography**

**Electronic Supplementary Information**

Kohei Abe <sup>a,d</sup>, Patrick Saul Atkinson <sup>b</sup>, Chi Shing Cheung <sup>b</sup>, Haida Liang <sup>b</sup>, Lucas Goehring <sup>b,\*</sup> and Susumu Inasawa <sup>a,c,‡</sup>

<sup>a</sup> Graduate School of Bio-Application and Systems Engineering, Tokyo University of Agriculture and Technology, 2-24-16 Naka-Cho, Koganei, Tokyo, 184-8588, Japan.

<sup>b</sup> School of Science and Technology, Nottingham Trent University, Clifton Lane, Nottingham, NG11 8NS, UK

<sup>c</sup> Department of Applied Physics and Chemical Engineering, Tokyo University of Agriculture and Technology

<sup>d</sup> Micro/Bio/Nanofluidics Unit, Okinawa Institute of Science and Technology Graduate University, 1919-1 Tan-cha, Onna, Kunigami, Okinawa, 904-0497, Japan.

Corresponding authors: \* [lucas.goehring@ntu.ac.uk](mailto:lucas.goehring@ntu.ac.uk) (L. Goehring) and ‡ [inasawa@cc.tuat.ac.jp](mailto:inasawa@cc.tuat.ac.jp) (S. Inasawa)

## S1. Prediction of particle concentration distribution from the collective diffusion coefficient

To predict the shape of the steady-state drying front for KE-W10 from Eq. (2), the gradient of the particle concentration distribution at  $\varphi$  was first taken as:

$$\frac{d\varphi}{dx} = \frac{(v-w)(\varphi - \varphi_0)}{D(\varphi)}. \quad (\text{S1})$$

Mass conservation also gives the following constraint,

$$v - w = -\frac{\varphi_f}{\varphi_0}w, \quad (\text{S2})$$

where  $\varphi_f = 0.59$  is the filling factor of particles in the packed region. The film growth rate,  $w$ , corresponds to the slope of the plots in Fig. 5(a), which is  $0.54 \mu\text{m s}^{-1}$ . Eq. (S2) and the fitted equation in Fig. 6(a) can be substituted into Eq. (S1). As a result, the following equation can be derived:

$$\frac{d\varphi}{dx} = \frac{(-\varphi_f w / \varphi_0)(\varphi - \varphi_0)}{3070\varphi^{2.80}D_0}, \quad (\text{S3})$$

where  $D_0$  is Stokes-Einstein coefficient. We perform a numerical integration by taking  $dx \sim \Delta x$  to be a small but finite distance, in which case  $\varphi$  at the updated location  $x + \Delta x$  can be written as:

$$\varphi(x + \Delta x) = \varphi(x) + \frac{(-\varphi_f w / \varphi_0)(\varphi - \varphi_0)}{3070\varphi(x)^{2.80}D_0}\Delta x \quad (\text{S4})$$

Finally, we approximate the far-field boundary condition  $\varphi \rightarrow \varphi_0 = 0.18$  by an initial value of  $\varphi(x_0) = 0.18001$ . Then  $\varphi(x)$  is calculated from this point by applying Eq. (S4) in  $\Delta x = 10 \mu\text{m}$  steps, and the resultant values of  $\varphi(x)$  are shown as the solid line in the inset of Fig. 6(a).

Similar steps were followed to generate the predicted particle concentrations shown in Fig. S6, for SM-30.

## S2. Movie captions

### Movie S1

Drying of SM-30 suspension with the initial particle concentration ( $\varphi_0$ ) of 0.06. Cell width  $W$  in the drying cell is 5 mm. 0.1 s in the movie corresponds to 2 min in real time.

### Movie S2

Drying of SM-30 suspension at  $\varphi_0 = 0.19$ . Cell width  $W$  in the drying cell is 5 mm. 0.1 s in the movie corresponds to 2 min in real time.

### Movie S3

Flow of SM-30 suspension at  $\varphi_0 = 0.06$  with fluorescence tracer particles. The movie was taken at the packing front. 0.1 s in the movie corresponds to 5 s in real time.

### Movie S4

Flow of SM-30 suspension at  $\varphi_0 = 0.19$  with fluorescence tracer particles. The movie was taken at the packing front. 0.1 s in the movie corresponds to 5 s in real time.

### S3. Supplemental figures

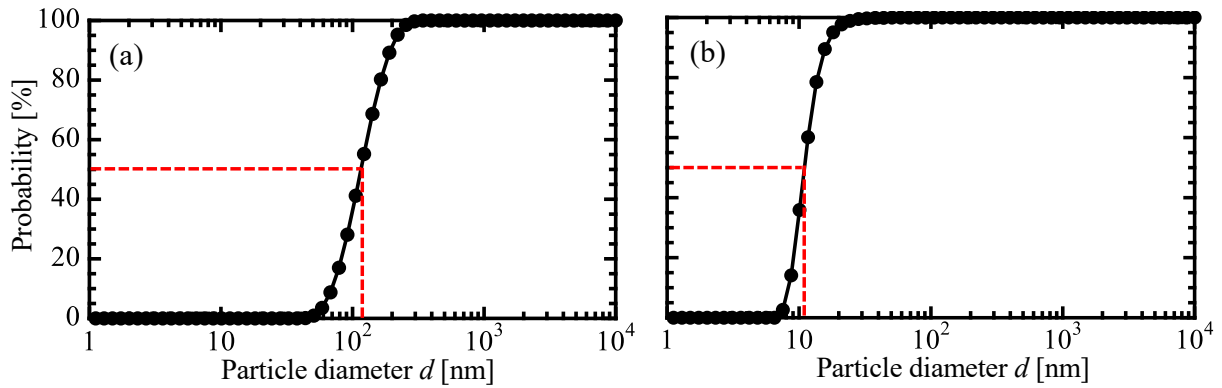

**Fig. S1** Cumulative particle size distributions of (a) KE-W10 and (b) SM-30, as measured by dynamic light scattering. The mean particle sizes are indicated by red dashed lines.

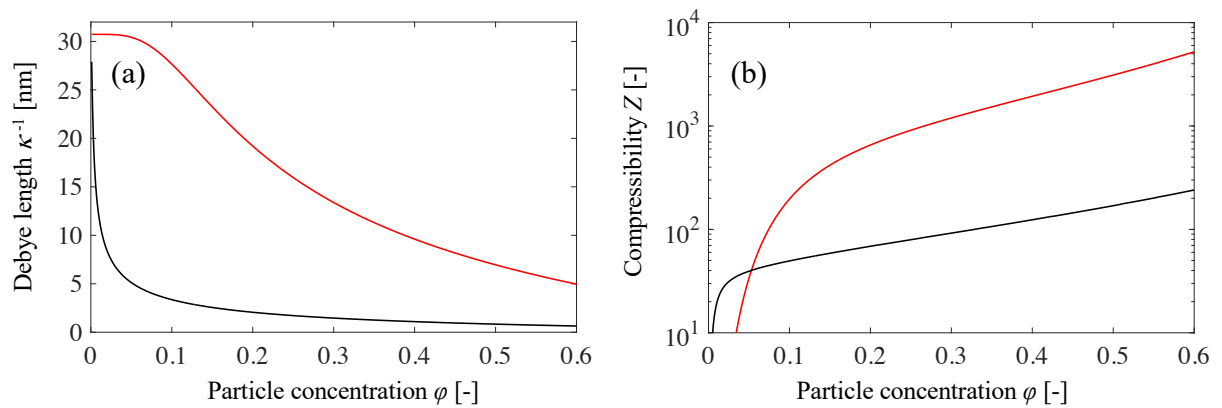

**Fig. S2** (a) The effective Debye length  $\kappa^{-1}$  and (b) osmotic compressibility  $Z$  of the KEW-10 (red) and SM-30 (black) suspensions were modelled using the non-linear Poisson-Boltzmann cell model of Trizac et al. (2003), as implemented in Goehring, Li and Kiatkirakajorn (2017). The particles were assumed to have a bare (non-renormalized) surface charge density of  $0.5 e^-/\text{nm}^2$  and to be in Donnan equilibrium with a solution of monovalent salt of concentration 0.1 mM.

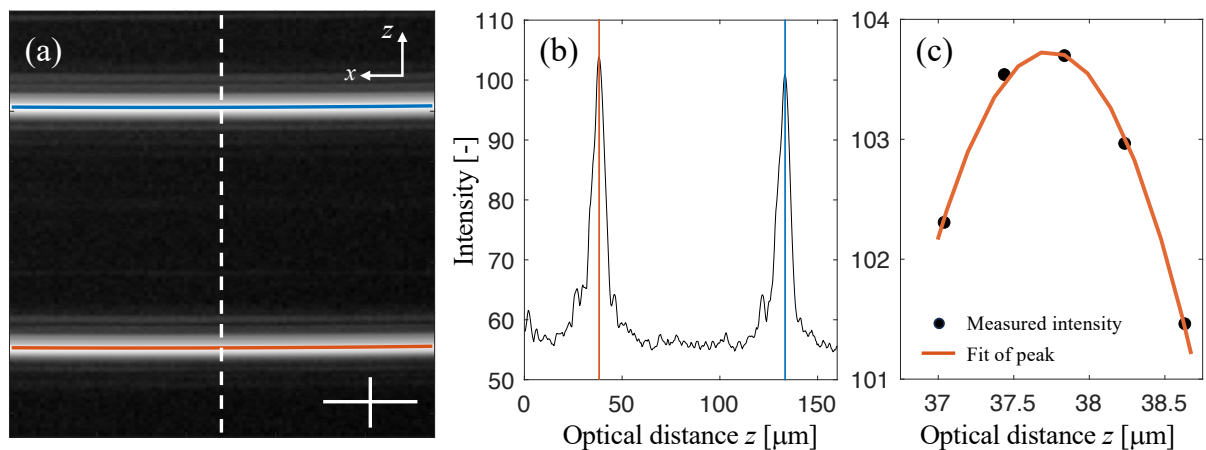

**Fig. S3** Feature extraction. (a) An example region of interest from an OCT image of an empty cell, with scale bars showing 100  $\mu\text{m}$  horizontally and 20  $\mu\text{m}$  vertically. The depth profile (A-scan) along the dashed line is extracted and shown in panel (b), with the positions of the lower and upper interfaces of the Hele-Shaw cell given by orange and blue lines, respectively. At the lower interface, panel (c) shows the local intensity profile around the peak along with a Gaussian fit, which achieves sub-pixel accuracy.

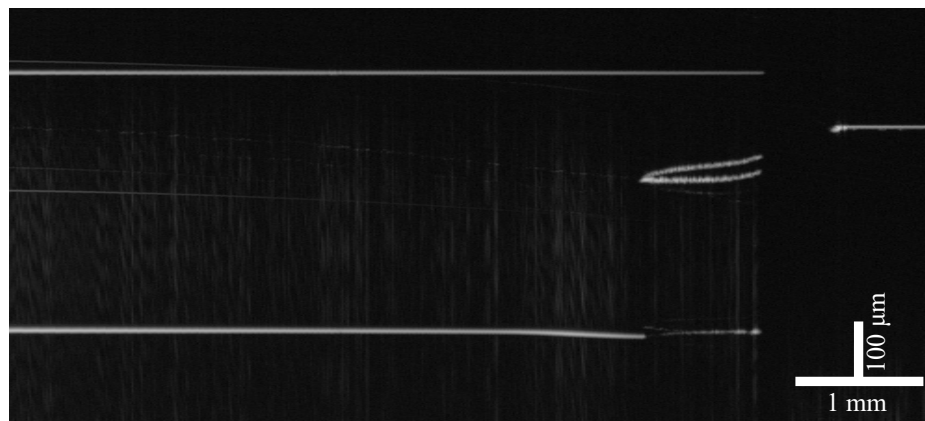

**Fig. S4** A cross-sectional OCT image of drying SM-30 suspension ( $d = 10$  nm) inside a drying cell where cell height  $H = 300$   $\mu\text{m}$ . The initial volume fraction of the suspension  $\phi$  is 0.20 and the image was captured 40 min after the suspension is injected into the cell. An internal crack is visible on the upper-right of the image, appearing as two bright lines in proximity. The reflection from the suspension-glass interface below the crack is blurred and suppressed in intensity.

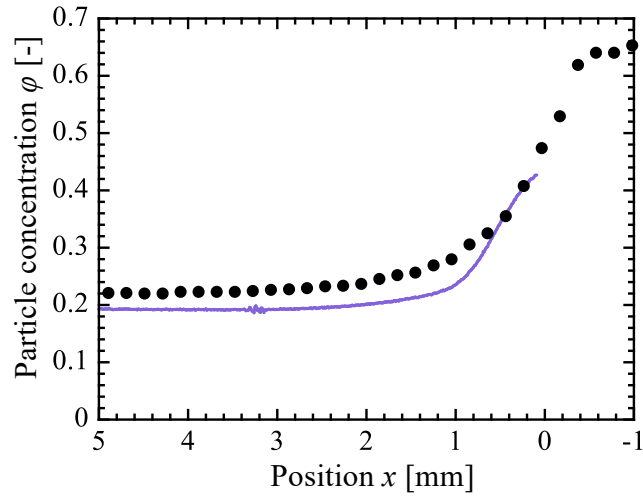

**Fig. S5** Comparison of particle concentration measurements acquired with OCT (purple line, from Fig. 3(c) at  $t = 20$  min) and data from a similar experiment observed with SAXS (black circles, data from Goehring, Li and Kiatkirakajorn (2017)). The data are aligned so that  $\phi = 0.42$  at  $x = 0$ . In both cases, Ludox SM-30 was measured in Hele-Shaw cells of thickness  $H = 300 \mu\text{m}$ , with evaporation rates estimated as  $1.2 \mu\text{m/s}$  (OCT)  $0.22 \mu\text{m/s}$  (SAXS). For the SAXS measurement the suspension had been dialysed against a  $5 \text{ mM}$  solution of NaCl. For OCT, no salt was added to the dialysis solution, apart from  $0.1 \text{ mM}$  NaOH to stabilize pH. Both data sets show consistent and comparable results, with the OCT giving better resolution ( $10 \mu\text{m}$  vs.  $200 \mu\text{m}$ ), but having difficulty with measurements once the film has solidified and cracked.

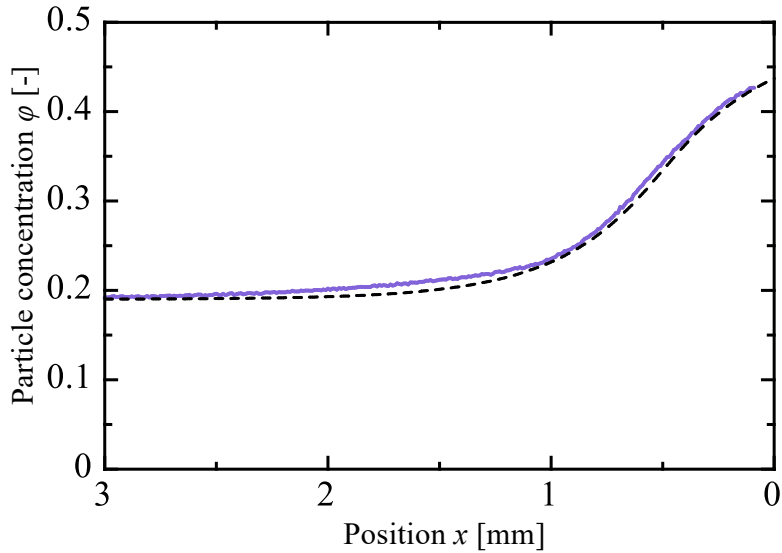

**Fig. S6** The particle concentration distribution of SM-30 was estimated (dashed line) by integrating Eq. (2), using the fitting function given in Fig. 6(b) as  $D(\phi)$ . The experimental result, acquired with OCT, is shown for comparison: purple solid line, at  $t = 40$  min, data from Fig. 3(c).
